# Supplementary material for: A new molecular diagnostic tool for surveying and monitoring Triops cancriformis populations
Source: PeerJ. 2017 May 11;5:e3228. doi: 10.7717/peerj.3228 (PMC5429740; doi:10.7717/peerj.3228)
Supplement: Supplemental Information 2 — ‘Y’ indicates a successful amplification of short, COI or long region per sample from this study. [file peerj-05-3228-s012.xlsx]

## Sheet: Sheet1
	Site A	Short	COI	Long		Site B	Short	COI	Long		Site C	Short	COI	Long		Site D	Short	COI	Long		Site E	Short	COI	Long		Site F	Short	COI	Long		Site G	Short	COI	Long		Site H	Short	COI	Long		Site I	Short	COI	Long		Site J	Short	COI	Long
		Y/-	Y/-	Y/-			Y/-	Y/-	Y/-			Y/-	Y/-	Y/-			Y/-	Y/-	Y/-			Y/-	Y/-	Y/-			Y/-	Y/-	Y/-			Y/-	Y/-	Y/-			Y/-	Y/-	Y/-			Y/-	Y/-	Y/-			Y/-	Y/-	Y/-
	1	-	Y	-		1	-	-	-		1	-	-	-		1	Y	Y	Y		1	-	-	-		1	-	Y	-		1	-	Y	-		1	-	Y	-		1	-	Y	-		1	Y	Y	Y
	2	-	-	-		2	-	-	-		2	-	Y	-		2	-	-	-		2	-	-	-		2	-	Y	-		2	Y	Y	-		2	-	Y	-		2	Y	Y	Y		2	-	Y	-
	3	-	-	-		3	-	Y	-		3	-	-	-		3	-	-	-		3	-	-	-		3	-	Y	-		3	-	Y	-		3	-	Y	-		3	-	Y	-		3	-	Y	-
	4	-	-	-		4	-	-	-		4	-	-	-		4	-	Y	-		4	-	Y	-		4	-	Y	-		4	-	-	-		4	-	Y	-		4	-	Y	-		4	-	Y	-
	5	-	Y	-		5	-	-	-		5	-	Y	-		5	-	-	-		5	-	Y	-		5	-	Y	-		5	-	Y	-		5	-	Y	-		5	-	Y	-		5	-	Y	-
	6	-	-	-		6	-	-	-		6	-	-	-		Total	1	2	1		6	-	-	-		6	-	Y	-		6	-	Y	-		6	-	Y	-		6	Y	Y	Y		6	-	Y	-
	7	-	-	-		7	-	-	-		7	-	-	-							Total	0	2	0		7	-	Y	-		7	Y	Y	Y		Total	0	6	0		7	-	-	-		7	Y	Y	Y
	8	-	-	-		8	-	-	-		8	-	-	-												8	Y	Y	Y		8	-	Y	-							8	-	-	-		8	Y	Y	Y
	9	-	-	-		9	-	-	-		9	-	-	-												9	-	Y	-		9	Y	Y	Y							9	Y	-	-		9	-	Y	-
	10	-	-	-		10	-	-	-		10	-	Y	-												10	-	-	-		10	Y	Y	Y							10	-	-	-		10	-	Y	-
	11	-	-	-		11	-	-	-		11	-	Y	-												Total	1	9	1		11	-	Y	-							11	-	-	-		11	Y	Y	Y
	12	-	-	-		Total	0	1	0		12	-	-	-																	12	-	Y	-							12	-	Y	-		12	Y	Y	Y
	13	-	-	-							13	-	-	-																	13	Y	Y	Y							13	-	Y	-		13	-	Y	-
	14	-	-	-							14	-	-	-																	14	Y	Y	-							14	-	-	-		14	-	Y	-
	15	-	-	-							15	-	-	-																	15	-	-	-							15	-	-	-		15	Y	Y	Y
	16	-	-	-							16	-	-	-																	16	-	Y	-							16	-	-	-		16	Y	Y	Y
	17	-	-	-							17	-	-	-																	17	-	Y	-							17	Y	Y	Y		17	Y	Y	Y
	18	-	-	-							18	-	-	-																	18	Y	Y	Y							Total	4	9	3		18	Y	Y	Y
	Total	0	2	0							19	-	-	-																	19	-	Y	-												19	Y	Y	Y
											20	-	-	-																	20	Y	Y	Y												20	Y	Y	-
											21	-	-	-																	21	-	Y	-												21	-	-	-
											22	-	-	-																	22	Y	Y	Y												22	-	Y	-
											23	-	-	-																	23	Y	Y	Y												23	Y	Y	Y
											Total	0	4	0																	24	Y	Y	-												24	Y	Y	Y
																															25	Y	Y	Y												25	-	Y	-
																															26	Y	Y	Y												26	Y	Y	Y
																															27	-	Y	-												27	-	Y	-
																															28	Y	Y	Y												28	Y	Y	Y
																															29	-	Y	-												29	-	Y	-
																															30	Y	Y	Y												30	Y	Y	Y
																															31	Y	Y	Y												31	Y	Y	Y
																															32	Y	Y	Y												32	-	-	-
																															33	-	Y	-												33	-	Y	-
																															34	-	Y	-												34	-	Y	-
																															35	-	Y	-												35	-	Y	-
																															36	-	Y	-												36	-	Y	-
																															37	-	Y	-												37	-	Y	-
																															38	-	-	-												38	-	Y	-
																															39	Y	Y	-												39	Y	Y	Y
																															40	Y	Y	Y												40	-	Y	-
																															41	Y	Y	Y												41	Y	Y	Y
																															42	-	Y	-												42	Y	Y	Y
																															43	Y	Y	Y												43	Y	Y	Y
																															44	-	Y	-												44	-	-	-
																															45	Y	Y	Y												45	-	Y	-
																															46	Y	Y	Y												46	-	-	-
																															47	Y	Y	-												47	Y	Y	Y
																															48	Y	Y	Y												48	-	-	-
																															49	Y	Y	Y												49	Y	Y	-
																															50	Y	Y	Y												50	-	Y	-
																															51	-	Y	-												51	Y	Y	Y
																															52	-	-	-												Total	24	46	22
																															53	Y	Y	Y
																															54	Y	Y	Y
																															55	-	Y	-
																															56	-	Y	-
																															57	-	Y	-
																															58	-	Y	-
																															59	Y	Y	Y
																															60	-	-	-
																															Total	30	55	25
